# Supplementary material for: Coronavirus Cell Entry Occurs through the Endo-/Lysosomal Pathway in a Proteolysis-Dependent Manner
Source: PubMed Central journal article supplement (PMC4223067; doi:10.1371/journal.ppat.1004502), 2014-11-06
Supplement: ppat.1004502.s001.pdf [file ppat.1004502.s001.pdf]

1 **Supporting Information**

2

3 **Coronavirus cell entry occurs through the endo-/lysosomal pathway in a proteolysis-**  
4 **dependent manner**

5

6 Christine Burkard<sup>1,†</sup>, Monique H Verheije<sup>1,#</sup>, Oliver Wicht<sup>1</sup>, Sander I van Kasteren<sup>2</sup>, Frank J  
7 van Kuppeveld<sup>1</sup>, Bart L Haagmans<sup>3</sup>, Lucas Pelkmans<sup>4</sup>, Peter J M Rottier<sup>1</sup>, Berend Jan Bosch<sup>1</sup>,  
8 Cornelis A M de Haan<sup>1,\*</sup>

9

10 <sup>1</sup>Virology Division, Department of Infectious Diseases and Immunology, Faculty of  
11 Veterinary Medicine, Utrecht University, Utrecht, The Netherlands

12 <sup>2</sup>Division of bio-organic synthesis, Leiden Institute of Chemistry, Leiden University, Leiden,  
13 The Netherlands

14 <sup>3</sup> Department of Viroscience, Erasmus MC, Rotterdam, The Netherlands

15 <sup>4</sup>Institute of Molecular Life Sciences, University of Zurich, Zurich, Switzerland

16 \* Corresponding author

17

18 † Current address: The Roslin Institute and Royal (Dick) School of Veterinary Studies,  
19 University of Edinburgh, Easter Bush, Edinburgh EH25 9RG, UK

20 # Current address: Department of Pathobiology, Division Pathology, Faculty of Veterinary  
21 Medicine, Utrecht University, Utrecht, The Netherlands

22

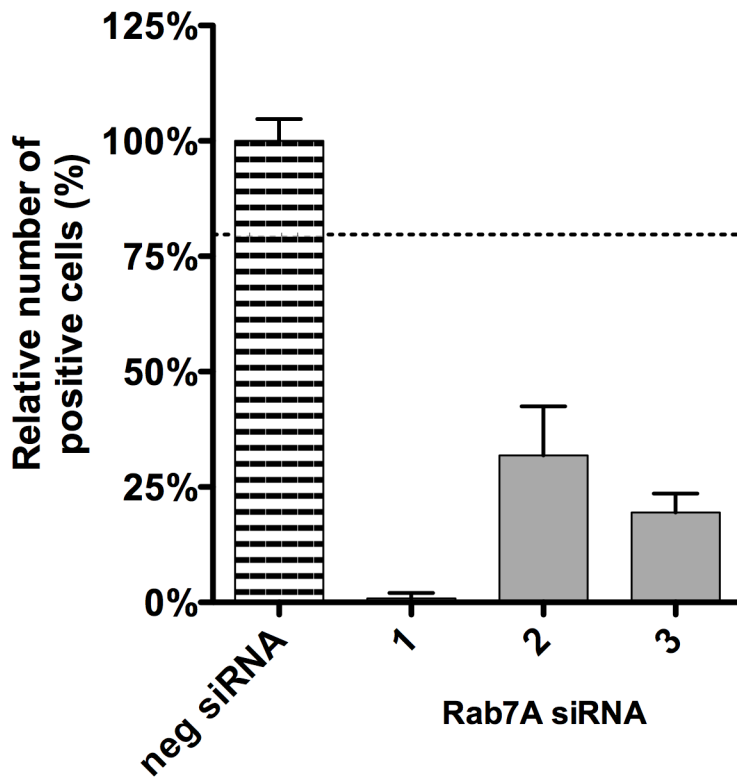

23  
24 **Figure S1.** Confirmation of protein knockdown upon Rab7A siRNA transfection. Cells were  
25 simultaneously transfected with mRFP-Rab7A plasmid and siRNAs against Rab7A. 24h post  
26 transfection cells were fixed and the number of positive cells assessed. Dotted line shows  
27 the lower 95% confidence interval of the negative siRNA control. Error bars represent  
28 SEM, n=3.  
29 .

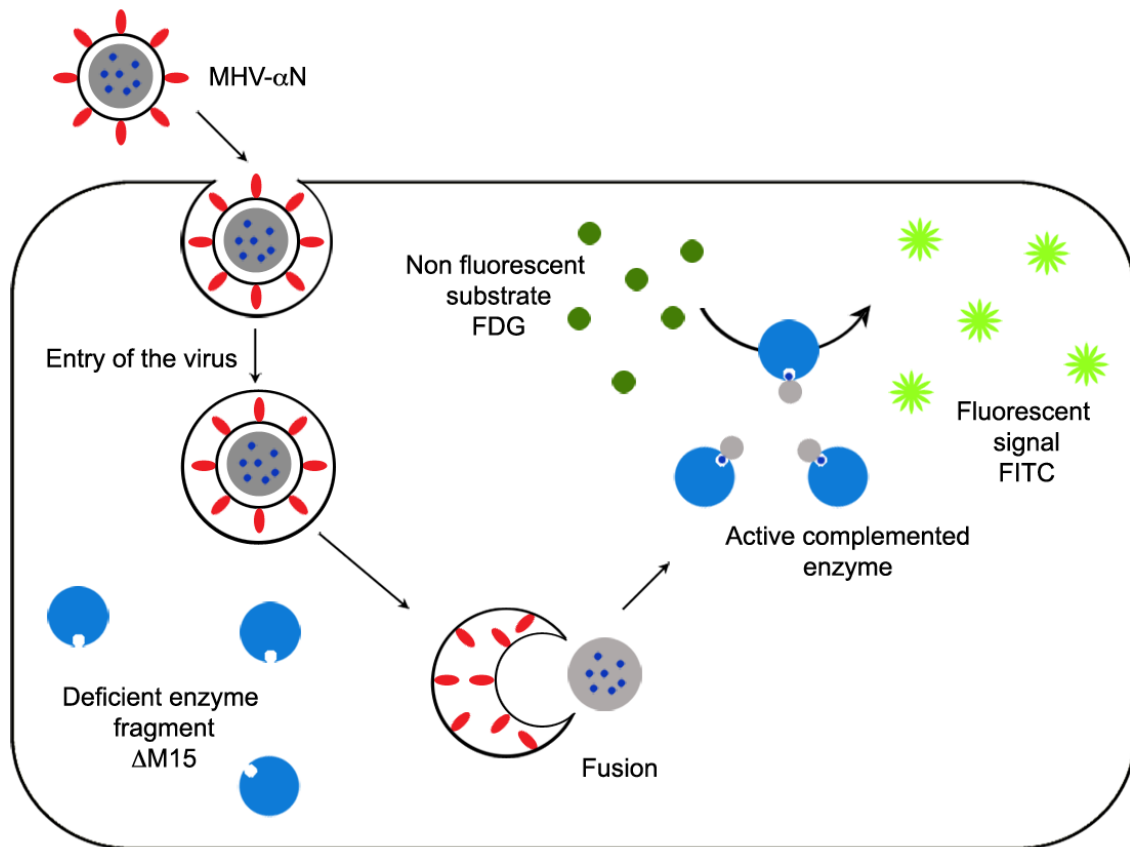

30  
 31 **Figure S2. Replication-independent fusion assay.** Recombinant MHV containing a  
 32 nucleocapsid protein with a 45-aa  $\alpha$ -peptide extension ( $\alpha$ N) are bound and internalized  
 33 into the target cells. Upon fusion the nucleocapsid proteins are released into the cytosol  
 34 where the deficient, inactive  $\beta$ -galactosidase enzyme  $\Delta$ M15 is present. The  $\Delta$ M15 is  
 35 subsequently complemented by the  $\alpha$ -peptide exposed by the N protein, thereby  
 36 reconstituting an active enzyme. This enzyme can now convert the FDG substrate  
 37 fluorescein, the production of which can be measured by FACS or fluorescence microscopy.

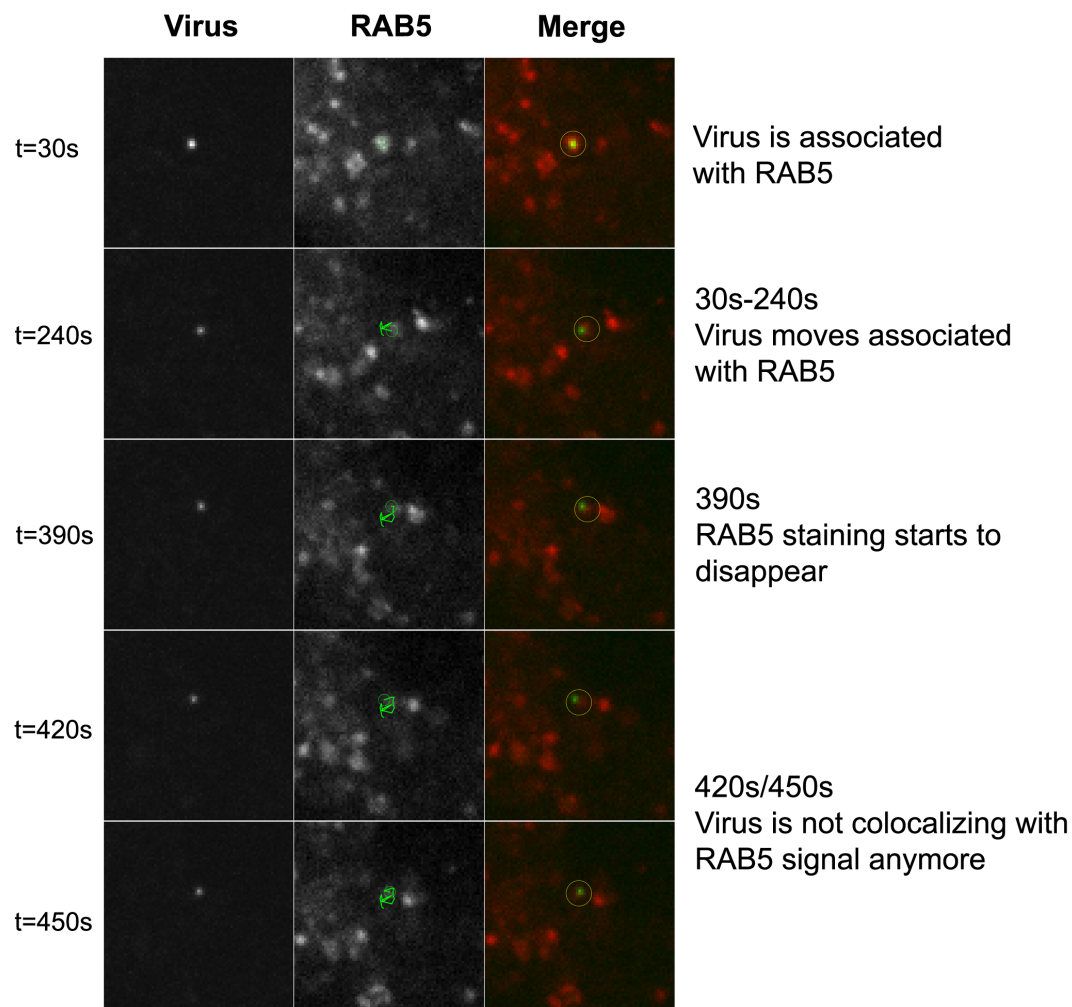

38  
39 **Figure S3. Stills from live-cell co-localization studies of MHV-DL488 with RAB5.** Green  
40 fluorescently-labeled MHV-DL488 virus was bound to RAB5-mRFP expressing HeLa-  
41 mCC1a cells at 4°C at MOI=20 for 90min. Inoculation medium was replaced by warm,  
42 trypan blue-containing medium, which shifts the emission spectrum of surface bound  
43 particles and thereby renders them undetectable in the 505-530nm channel [64]. Cells  
44 were imaged using a spinning-disc confocal microscope acquiring z-stacks in 30s intervals  
45 over 10min time intervals from 10-70min post warming. Virus particles were  
46 automatically detected and circled in the green channel. Upon overlay of the selected virion  
47 areas with the red channel co-localization was assessed by measurement of the underlying  
48 pixel density. Virion and endosomal vesicle movement were manually tracked separately in  
49 x/y- and z-direction. Co-localization over time was analyzed and scored (Fig. 4). A virion is  
50 shown, which is initially co-localizing/associating with RAB5. The virus moves together  
51 with the vesicle in x/y- and z-direction. 390s after the start of the recording the RAB5  
52 staining surrounding the virion starts to disappear, indicating that the virus is now  
53 dissociated from the RAB5-positive vesicle (classified as 'Assoc/Dissoc' in Fig. 4B).

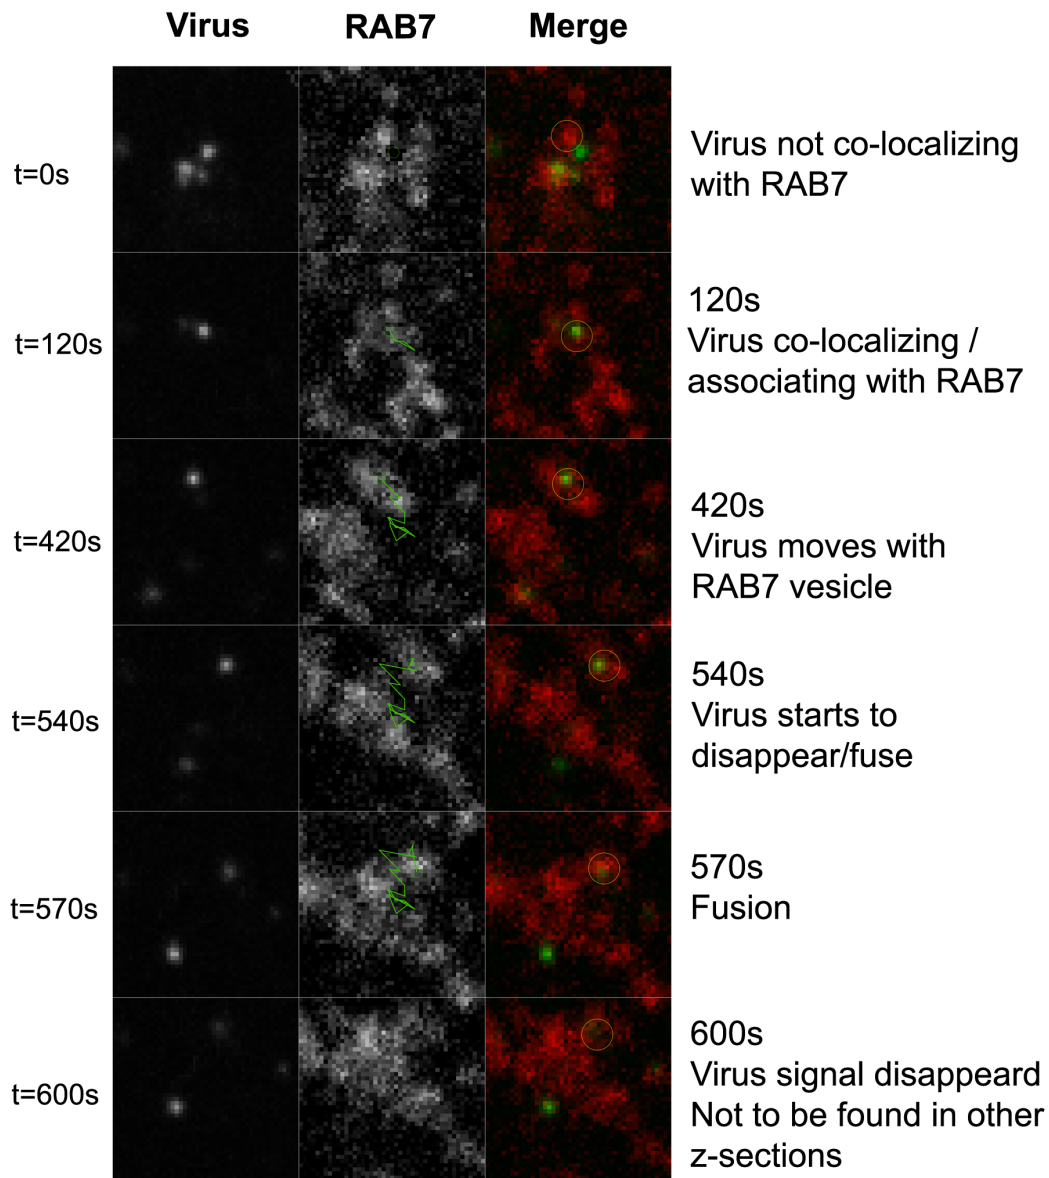

54  
55 **Figure S4. Stills from live-cell co-localization studies of MHV-DL488 with RAB7. Live**  
56 **cell imaging was performed as described in the legend to supplementary Fig. S2,**  
57 **using cells expressing RAB7-mRFP instead of RAB5-mRFP. A virion is shown, which is**  
58 **initially not co-localizing with a RAB7 vesicle. 120s after the start of the recording the virus**  
59 **associates with the RAB7-positive late endosomal/lysosomal (LE/LY) vesicle. The virus**  
60 **moves together with the vesicle in x/y- and z direction until about t=540s, after which the**  
61 **green fluorescence of the virus starts to disappear. At t=600 sec, the green fluorescence has**  
62 **disappeared completely indicating that the virus has fused with the late**  
63 **endosomal/lysosomal compartment (classified as 'Fusing' in Fig. 4B).**

64

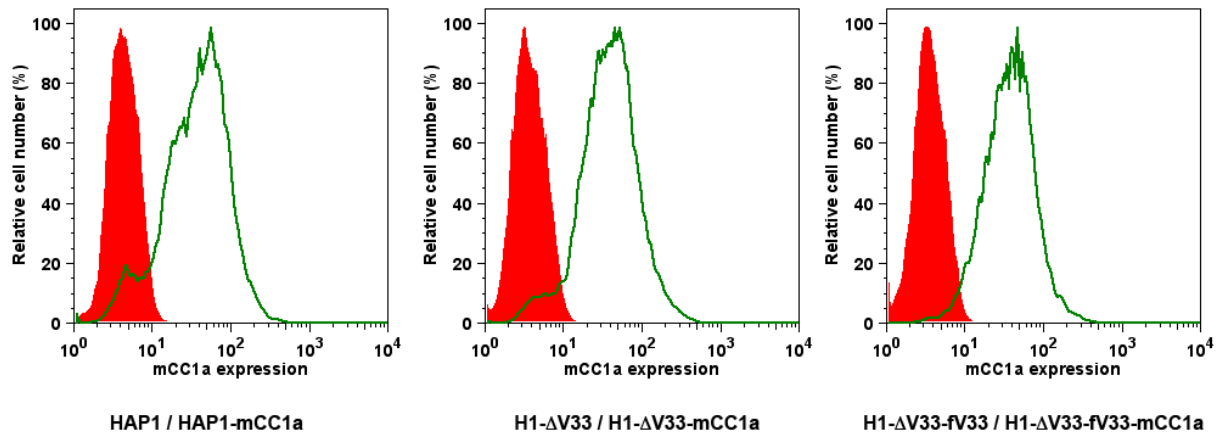

65  
 66 **Figure S5. Confirmation of even expression of mCeacam in haploid cells.** HAP1, H1-  
 67  $\Delta$ V33, and H1- $\Delta$ V33-fV33 cells and their stably mCeacam1a expressing counterparts were  
 68 immunostained using N-CEACAM-Fc [80] primary and secondary AF488 goat anti-rabbit  
 69 antibody and analyzed by FACS. Left panel shows HAP1 (red) and HAP1-mCC1a cells  
 70 (green), middle H1- $\Delta$ V33 (red) and H1- $\Delta$ V33-mCC1a (green), right H1- $\Delta$ V33-fV33 (red)  
 71 and H1- $\Delta$ V33-fV33-mCC1a (green).  
 72

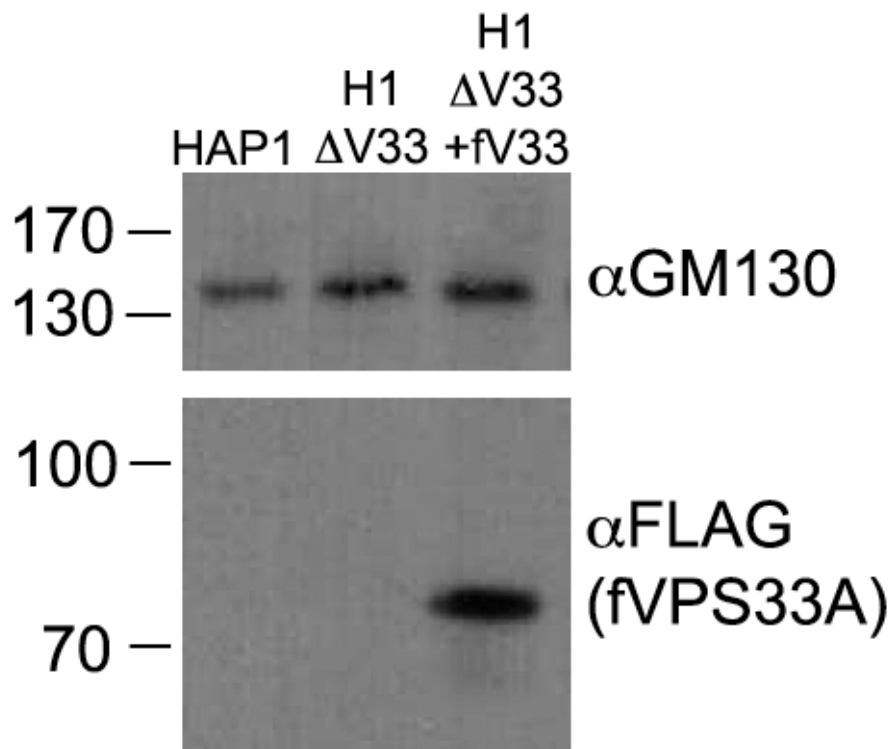

73  
 74 **Figure S6. Confirmation of re-transfection of FLAG-VPS33A.** Lysates of HAP1, H1-ΔV33,  
 75 and H1-ΔV33-fV33 cells, the latter stably re-transfected with FLAG-VPS33A, were subjected  
 76 to immunoblotting after gel electrophoresis. Antibodies used were against FLAG and  
 77 GM130, the latter to control the loading, were used.

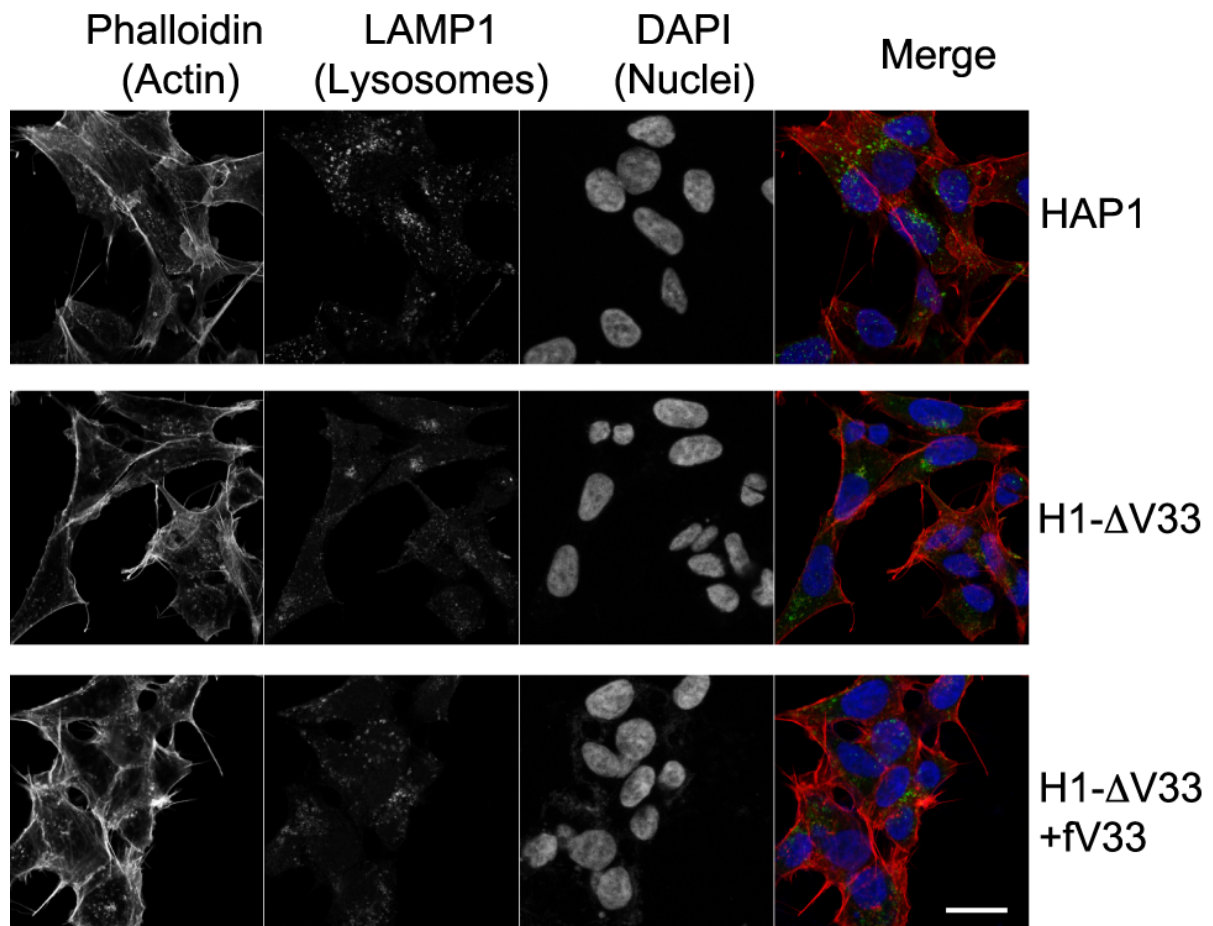

78  
79 **Figure S7: Localization of lysosomes is affected in haploid cells lacking VPS33A.**  
80 HAP1, H1-ΔV33, and H1-ΔV33-fV33 cells were fixed and stained with rabbit anti-LAMP1  
81 and AF488-conjugated anti-rabbit, AF568-conjugated Phalloidin, and DAPI. Cells were  
82 analyzed by confocal microscopy. Scale bar indicates 20μm.



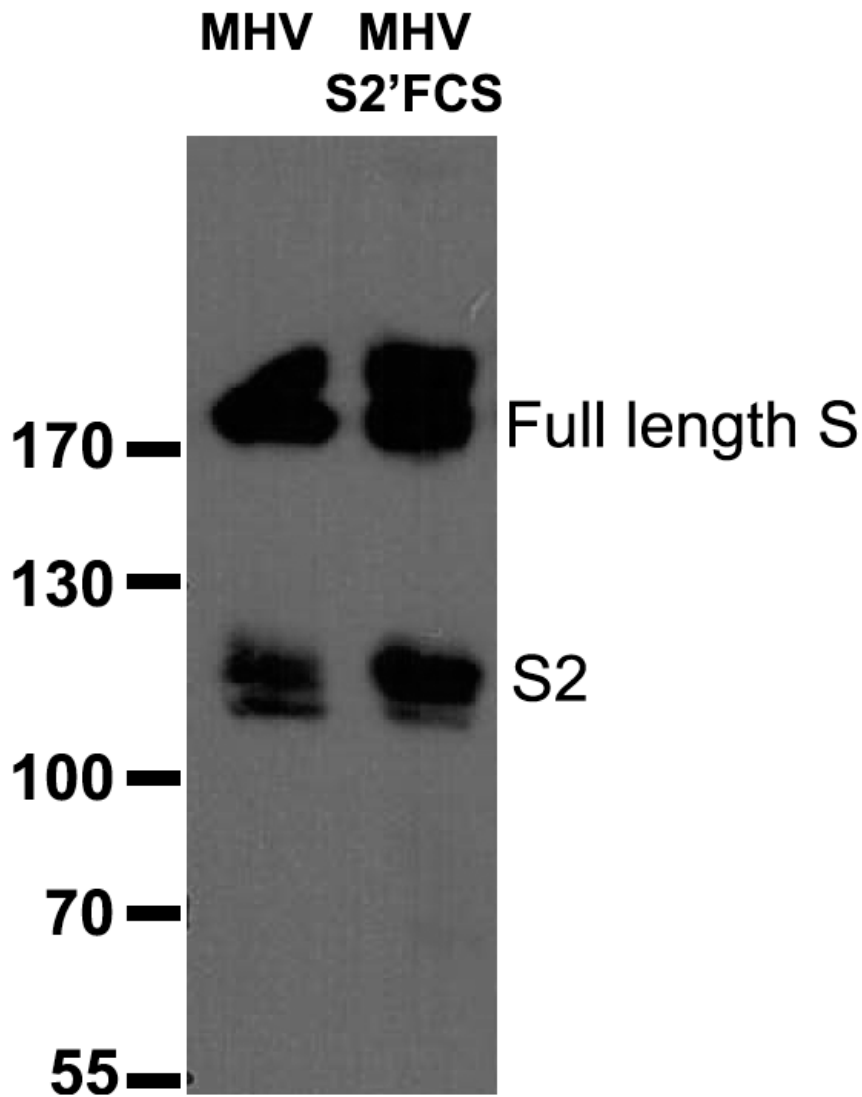

83  
 84 **Figure S8. Western blot analysis of spike proteins of purified MHV and MHV-S2'FCS.**  
 85 20% sucrose cushion purified MHV (MHV) and MHV-S2'FCS were subjected to gel  
 86 electrophoresis and immunoblotting using antibodies recognizing the carboxy-terminal  
 87 part of the spike protein. Regardless of the virus preparations used, either the full length S  
 88 protein or the full length S2 subunit is detected with this antibody. There is no indication  
 89 that the S protein carrying the FCS is cleaved during biogenesis of the virus ore thereafter.

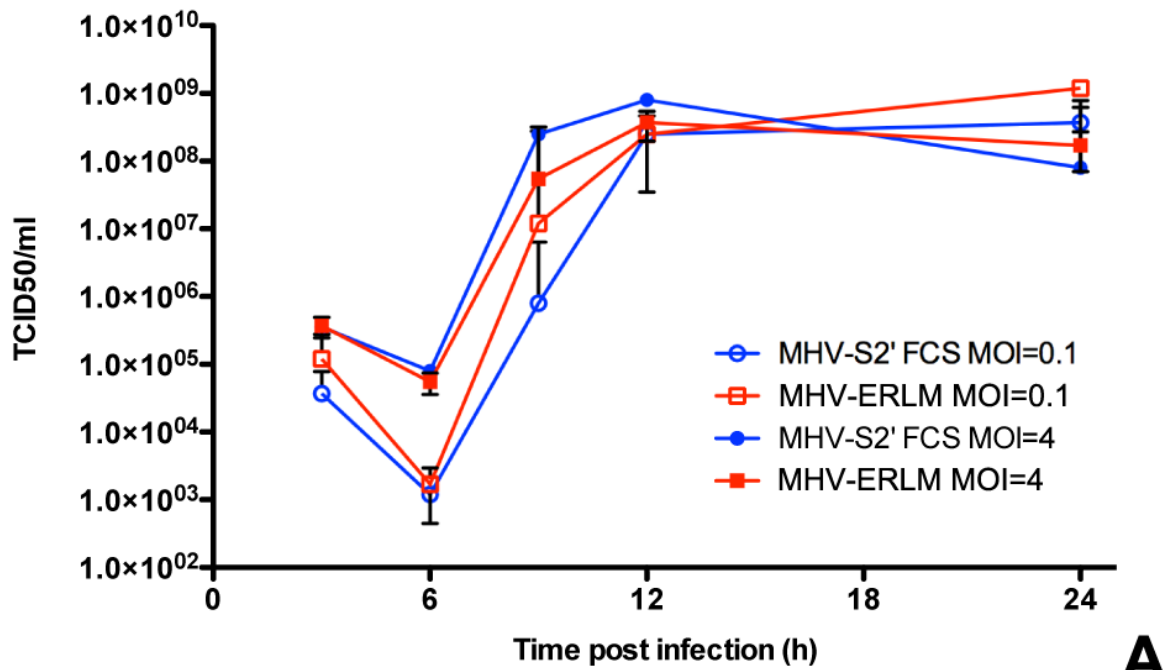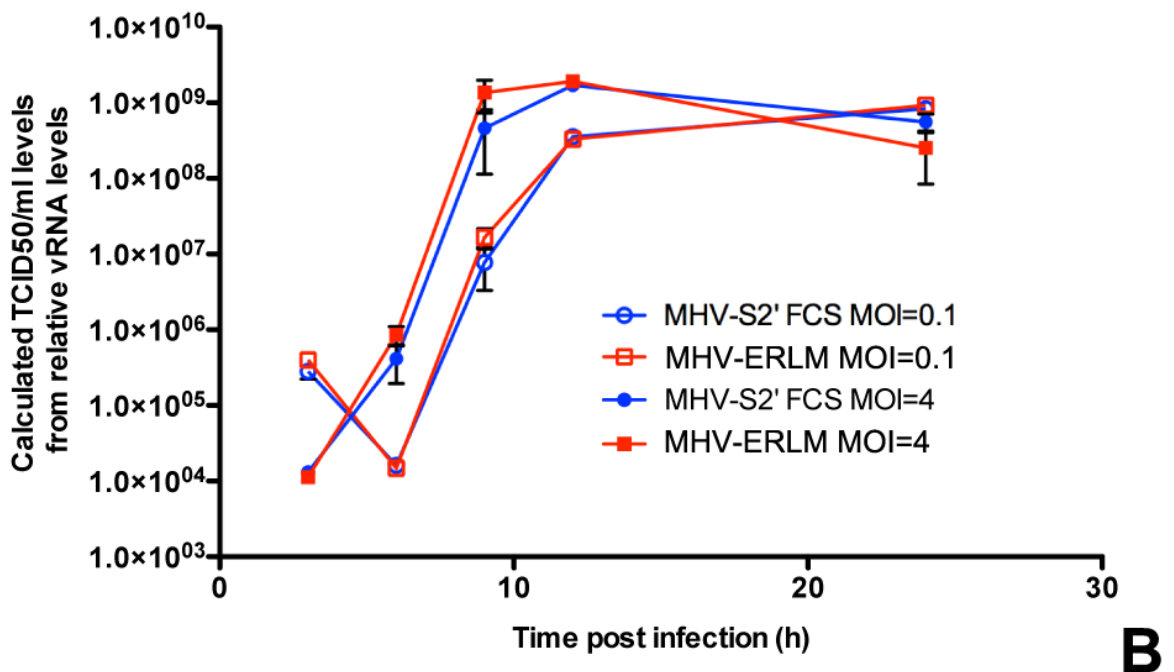

90  
 91 **Figure S9. Growth curve of MHV and MHV-S2'FCS.** LR7 cells were inoculated with the  
 92 wild type S containing MHV (MHV-ERLM) or MHV-S2'FCS. At the indicated times thereafter,  
 93 cell culture supernatants were collected for **A)** TCID50 analysis or **B)** measurement of the  
 94 amount of released viral RNA by qRT-PCR. Error bars represent SEM, n=3

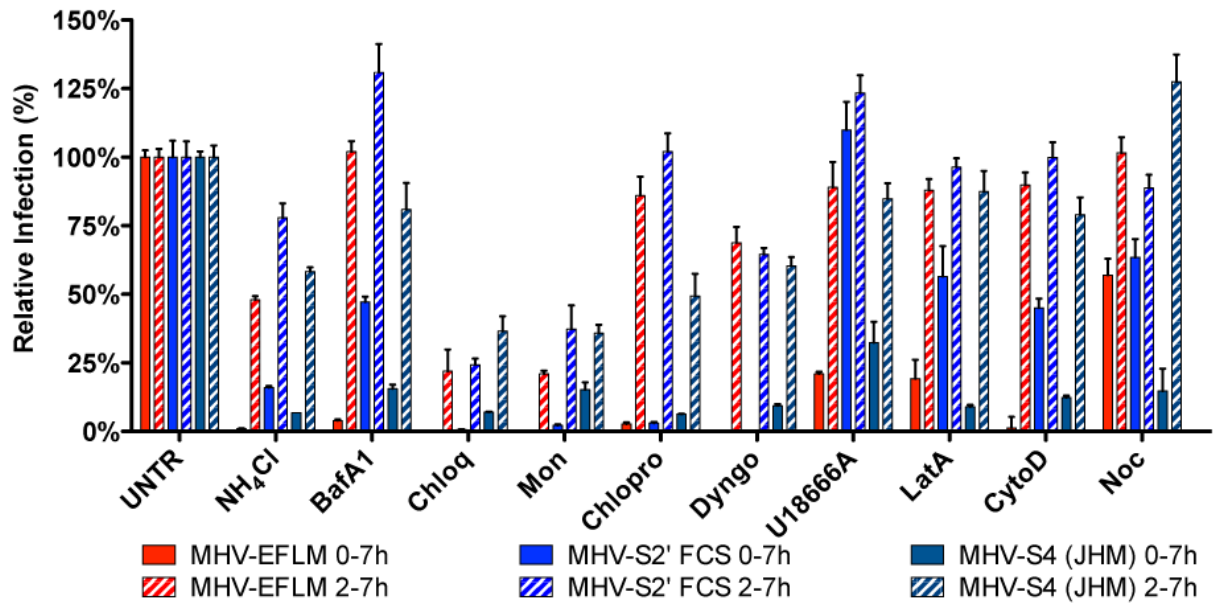

95  
 96 **Figures S10. Effects of endocytosis-affecting agents on MHV-S2'FCS and MHV-S4**  
 97 **(JHM) infection.** HeLa-mCC1a cells were inoculated with MHV-EFLM, MHV-S2'FCS, or  
 98 MHV-S4 (JHM) at MOI=0.2 or MOI=0.1 (MHV-S4) for 2h. Cells were (pre-)treated with  
 99 ammonium chloride (NH<sub>4</sub>Cl), Bafilomycin A1 (BafA1), Chloroquine (Chloq), Monensin  
 100 (Mon), Chlorpromazine (Chlopro), Dyngo-4A, U18666A, Latrunculin A, (LatA), Cytochalasin  
 101 D (DytoD), and Nocodazole (Noc), from 30 min prior to 7h post infection (0-7) or from 2 to  
 102 7h post infection (2-7). Infection levels were determined by measuring the luciferase  
 103 activity in cell lysates relative to mock-treated cells (UNTR). Error bars represent 1 SEM,  
 104 n=3\*3.

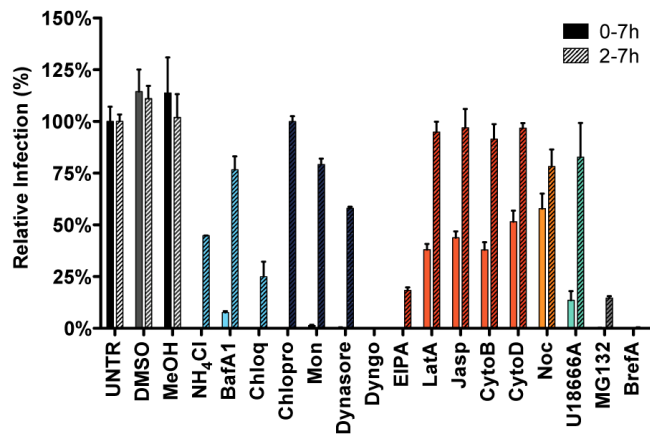

**A**

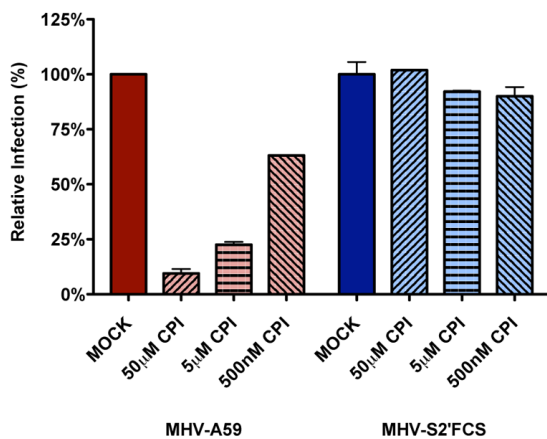

**B**

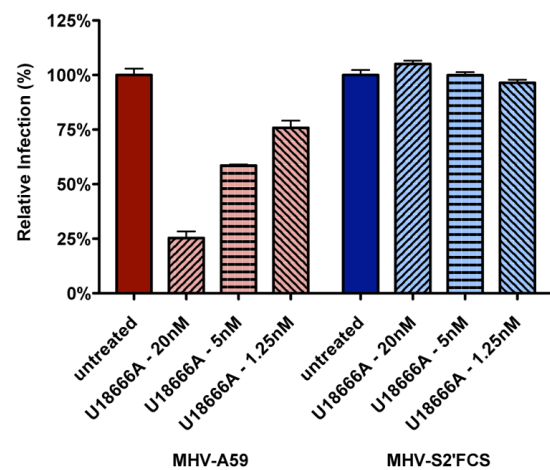

**C**

105  
 106 **Figure S11. Entry of MHV-A59 in murine LR7 cells also requires endosomal**  
 107 **maturation. A)** Clathrin-mediated endocytosis and late endosome-to-lysosome trafficking  
 108 is required for entry of MHV in murine LR7 cells. LR7 cells, inoculated with MHV-EFLM at  
 109 MOI=0.2, were treated with the different inhibitors from 30 min prior to 7h post  
 110 inoculation (0-7h) or from 2-7 h post inoculation (2-7h; hatched bars): ammonium chloride  
 111 (NH<sub>4</sub>Cl), Bafilomycin A1 (BafA1), Chloroquine (Chloq), Chlorpromazine (Chlopro),  
 112 Monensin (Mon), Dynasore, Dyngo-4A (Dyngo), EIPA, Latrunculin A (LatA), Jasplakinolide  
 113 (Jasp), Cytochalasin B (CytoB), Cytochalasin D (CytoD), Nocodazole (Noc), MG132,  
 114 Brefeldin A (BrefA), as well as solvents dimethyl sulfoxide (DMSO) and methanol (MeOH).  
 115 Infection levels were determined by measuring the luciferase activity in cell lysates relative  
 116 to mock-treated cells (UNTR). **B)** Pan-lysosomal protease inhibitor CPI blocks infection of  
 117 LR7 cells with MHV-EFLM (MHV-A59) but not with MHV-S2'FCS. Cells were pretreated  
 118 with increasing concentrations of CPI for 30min. Subsequently cells were inoculated with  
 119 luciferase-expressing MHV-A59 or MHV-S2'FCS at MOI=0.2. Inoculum was removed at 2hpi  
 120 and infection allowed to continue until 7hpi. The inhibitor was kept present at the same  
 121 concentration throughout the experiment. Infection levels were determined by measuring  
 122 the luciferase activity in cell lysates relative to lysates of mock-treated cells. **C)** U18666A

123 inhibits infection of LR7 cells with MHV-EFLM (MHV-A59) but not MHV-S2'FCS.  
124 Concentration dependent-inhibition of infection by U18666A was determined as described  
125 in B for CPI. **A-C)** Error bars represent SEM, n=3\*3.  
126

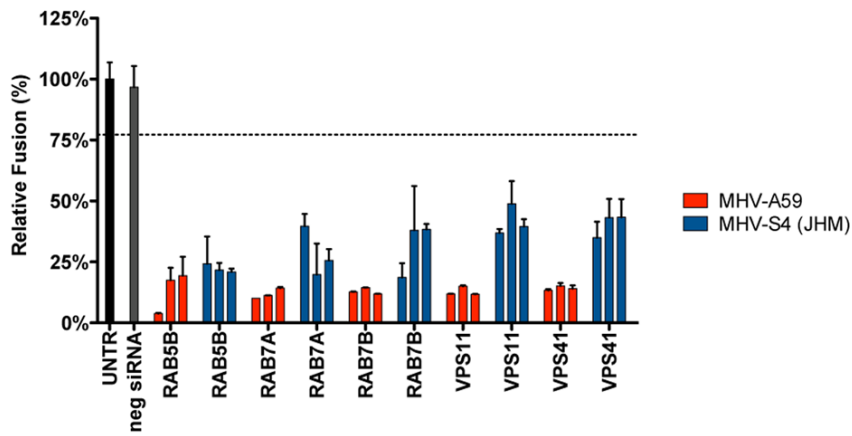

**A**

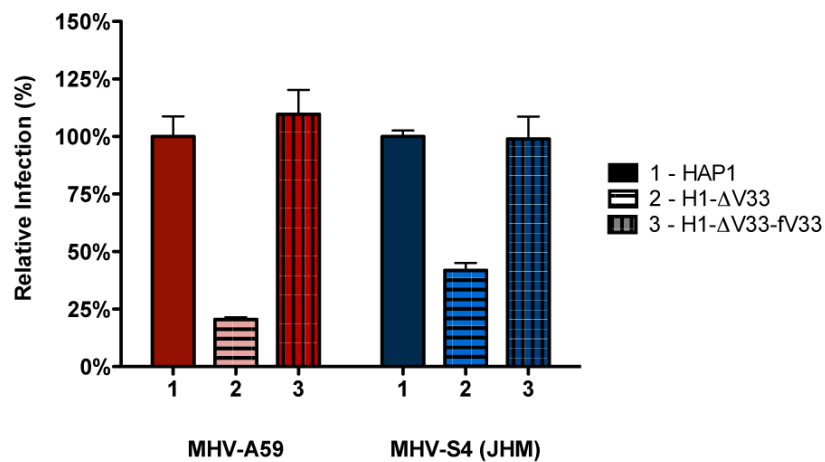

**B**

127  
 128 **Figure S12. MHV-S4 (JHM) requires late endosomal factors and a functional HOPS**  
 129 **complex for efficient infection. A)** siRNA-mediated gene silencing was performed as  
 130 described in the legend to Figure 1. At 72h post transfection, HeLa-mCC1a were inoculated  
 131 with MHV-EFLM-S4 (JHM) or MHV-EFLM at MOI=0.2 and incubated until 7hpi. Infection  
 132 levels were determined by measuring the luciferase activity in cell lysates relative to mock-  
 133 treated cells. Dotted line shows the lower 95% confidence interval of the negative siRNA  
 134 controls. **B)** Haploid HAP1 cells (HAP1), haploid cells lacking VPS33A (H1-ΔV33) or  
 135 VPS33A-lacking haploid cells retransfected with FLAG-tagged VLP33A (H1-ΔV33-fv33)  
 136 were infected (MOI=0.2) with MHV-EFLM (MHV-A59) or MHV-S4 (JHM) for 7h. Infection  
 137 levels were determined by measuring the luciferase activity in cell lysates relative to mock-  
 138 treated cells. **A, B)** Error bars represent SEM, n=3\*3.
